# Supplementary material for: Dietary compound isoliquiritigenin prevents mammary carcinogenesis by inhibiting breast cancer stem cells through WIF1 demethylation
Source: PubMed Central journal article supplement (PMC4496402; doi:10.18632/oncotarget.3396), 2015-03-26
Supplement: oncotarget-06-9854-s001.pdf [file oncotarget-06-9854-s001.pdf]

SUPPLEMENTARY FIGURE

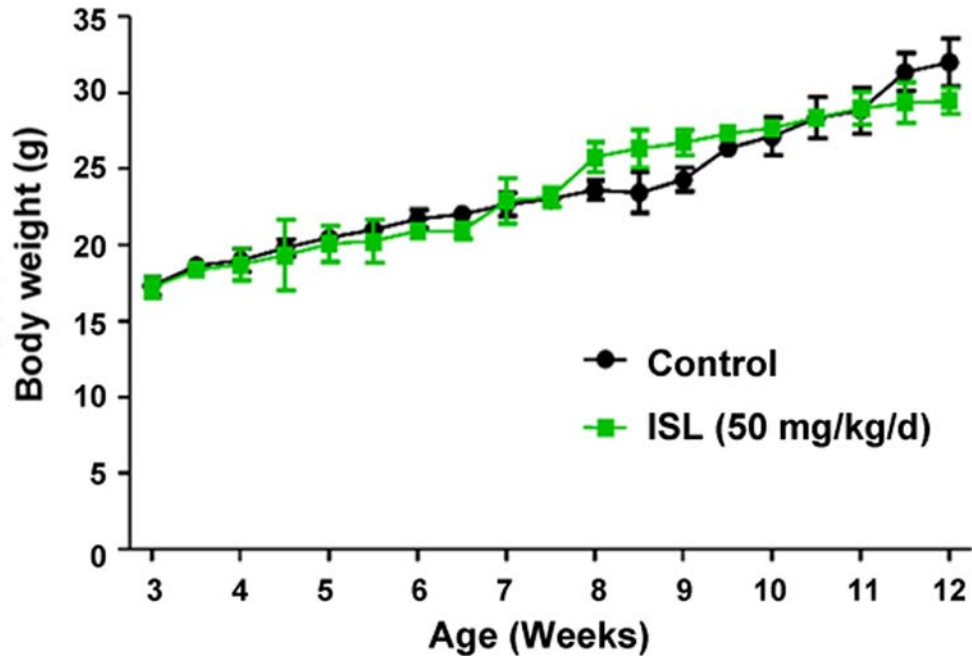

Supplementary Figure S1: ISL brought little influences on mice body weight.
